# Supplementary material for: Identification of the novel bacterial blight resistance gene Xa46(t) by mapping and expression analysis of the rice mutant H120
Source: PubMed Central journal article supplement (PMC7387522; doi:10.1038/s41598-020-69639-y), 2020-07-28
Supplement: 41598_2020_69639_MOESM1_ESM.pdf [file 41598_2020_69639_MOESM1_ESM.pdf]

**Identification of the novel bacterial blight resistance gene *Xa46(t)* by mapping and expression analysis of the rice mutant H120**

Shen Chen, Congying Wang, Jianyuan Yang, Bing Chen, Wenjuan Wang, Jing Su, Aiqing Feng, Liexian Zeng & Xiaoyuan Zhu\*

```

....|.....|. ....|. ....|. ....|. ....|. ....|. ....|. ....|. ....|.
      5      15      25      35      45      55
H120 -----TAGC TGCCACGTCA GCTAGGGGAT -GGTAGGCCG GCGCACGGTG GCACAATGTC
CBB23 CTGAGGTAGC TGCCACGTCA GCTAGGGGAT CGGCCCGGCC GC-CACGGTG GCACAATGTC
Consensus      *** ***** ***** ** * * ** ***** *****

```

```

....|. ....|. ....|. ....|. ....|. ....|. ....|. ....|. ....|. ....|.
      65      75      85      95      105     115
H120 AGCGCCAGTC CCGTTGGCGC TGACACGGCC AACGTCAGCG CCAATGTATA TGGCGCTGAG
CBB23 AGCGCCAGTC CCGTTGGCGC TGACACGGCC AACGTCAGCG CCAATGTGTT TGGCGCTGAG
Consensus ***** ***** ***** ***** ***** * *****

```

```

....|. ....|. ....|. ....|. ....|. ....|. ....|. ....|. ....|. ....|.
     125     135     145     155     165     175
H120 GCGACGGCCT ATTTTGGT GAAGTTTTG GCAGGGGTTA GTTTCGAAAT AAGTTTTCCA
CBB23 GCGACGGCCT ATTTTGGT GAAGTTTTG GCAGGGGTTA GTTTCGAAAT AAGTTTTCCA
Consensus ***** ***** ***** ***** ***** *****

```

```

....|. ....|. ....|. ....|. ....|. ....|. ....|. ....|. ....|. ....|.
     185     195     205     215     225     235
H120 AAAGGGTCAA TTTGTCAAAA AAACGGCTCG TCCCTGAGTC AAAGTCTTCC CTATTA AATT
CBB23 AAAGGGTCAA TTTGTCAAAA AAACGGCTCG TCCCTGAGTC AAAGTCTTCC CTATTA AATT
Consensus ***** ***** ***** ***** ***** *****

```

```

....|. ....|. ....|. ....|. ....|. ....|. ....|. ....|. ....|. ....|.
     245     255     265     275     285     295
H120 ATGCGGCATC ACTAACATCA GCTACTATAA AAGTCCCTTC CGCGTCACTA ACATCAGCTA
CBB23 ATGCGGCATC ACTAACATCA GCTACTATAA AAGTCCCTTC CGCGTCACTA ACATCAGCTA
Consensus ***** ***** ***** ***** ***** *****

```

```

....|. ....|. ....|. ....|. ....|. ....|. ....|. ....|. ....|. ....|.
     305     315     325     335     345     355
H120 CTATAAAAGT CCCTTCCGCA TCACTAACAT CTCCTCCCG CATCACTAAC ATCAGCTTCT
CBB23 CTATAAAAGT CCCTTCCG-- ----AAACAT CTCCTCCCG CATCACTAAC ATCAGCTTCT
Consensus ***** ***** ***** ***** ***** *****

```

```

....|. ....|. ....|. ....|. ....|. ....|. ....|. ....|. ....|. ....|.
     365     375     385     395     405     415
H120 ATAAAAGCCC TTCCTTGTG CATCATCTCA AGGAGCTGCA AGCACTTCTT CTCTGGCAGC
CBB23 ATAAAAGCCC TTCCTTGTG CATCATCTCA AGGAGCTGCA AGCACTTCTT CTCTGGCAGC
Consensus ***** ***** ***** ***** ***** *****

```

```

....|. ....|. ....|. ....|. ....|. ....|. ....|. ....|. ....|. ....|.
     425     435     445     455     465     475

```

H120 ACTTCCTCAT CTCAAGGAGT TGCAAATGTT GCATCATCTC AAGGAGCTGG CAGCCGTAGC  
CBB23 ACTTCCTCAT CTCAAGGAGT TGCAAATGTT GCATCATCTC AAGGAGCTGG CAGCCGTAGC  
Consensus \*\*\*\*\*

....|....| ....|....| ....|....| ....|....| ....|....| ....|....|  
485 495 505 515 525 535

H120 CGGTATACAC ATGATCCTCA TCTACCTCTG CCGCTTTCTC CTCCGCCGCA GCCGCAACGT  
CBB23 CGGTATACAC ATGATCCTCA TCTACCTCTG CCGCTTTCTC CTCCGCCGCA GCCGCAACGT  
Consensus \*\*\*\*\*

....|....| ....|....| ....|....| ....|....| ....|....| ....|....|  
545 555 565 575 585 595

H120 ATTATTCACT GTTCCAACA GCCTCCGTTT TCGCCTCAAG GTATTAAC TGATTGTTGTA  
CBB23 ATTATTCACC GTTCCAACA GCCTCCGTTT TCGCCTCAAG GTATTAAC TGATTGTTGTA  
Consensus \*\*\*\*\*

....|....| ....|....| ....|....| ....|....| ....|....| ....|....|  
605 615 625 635 645 655

H120 CATATGTCTC TCGGTCATGC TGTCTACCT GTTGGCTCC ATCATGCCGC TGCCGCCGTG  
CBB23 CATATGTCTC TCGGTCATGC TGTCTACCT GTTGGCTCC ATCATGCCGC TGCCGCCGTG  
Consensus \*\*\*\*\*

....|....| ....|....| ....|....| ....|....| ....|....| ....|....|  
665 675 685 695 705 715

H120 GGGCCTCGTG GTCGGTTGGG TCATGGCCCT CATCGCCGTC GAGCTCGCCT ACGCCTTCAT  
CBB23 GGGCCTCGTG GTCGGTTGGG TCATGGCCCT CATCGCCGTC GAGCTCGCCT ACGCCTTCAT  
Consensus \*\*\*\*\*

....|....| ....|....| ....|....| ....|....| ....|....| ....|....|  
725 735 745 755 765 775

H120 CTTCCATAT AGCTTTCGCT ACATCGCTGA CAACGACGAC GACAAGATGG TTATTCTCCC  
CBB23 CTTCCATAT AGCTTTCGCT ACATCGCTGA CAACGACGAC GACAAGATGG TTATTCTCCC  
Consensus \*\*\*\*\*

....|....| ....|....| ....|....| ....|....| ....|....| ....|....|  
785 795 805 815 825 835

H120 TGTTTAAGCC TTCAGGGCCT ATATATATAG TATATATATA AAGCCTTCCA TACTGTCTCT  
CBB23 TGTTTAAGCC TTCAGGGCCT ATATATATAG TATATATATA AAGCCTTCCA TACTGTCTCT  
Consensus \*\*\*\*\*

....|....| ....|....| ....|....| ....|....| ....|....| ....|....|  
845 855 865 875 885 895

H120 TCAATAAAGG CTAGCTTGTG TTGTGAGTTG TATCTGTGTA CGTATTTTGT TTGTTGGTT  
CBB23 TCAATAAAGG CTAGCTTGTG TTGTGAGTTG TATCTGTGTA CGTATTTTGT TTGTTGGTT

```

Consensus ***** ***** ***** ***** ***** *****
....|....| ....|....| ....|....| ....|....| ....|....| ....|....|
      905      915      925      935      945      955
H120 ATATATTGTC ACGTAG-TAT GCCATATATA TATGTATTGC TGTATTTATA TTTGTTACTA
CBB23 ATATATTGTC ACGTAGGTAT GCCATATATA TATGTATTGC TGTATTTATA TTTGTTACTA
Consensus ***** ***** *** ***** ***** ***** ***** *****

....|....| ....|....| ....|....| ....|....| ....|....| ....|....|
      965      975      985      995      1005      1015
H120 TCTTT-GTTT TTCAGATA-T AAAATTCAGC CAGCCTTGCT -GCTTCGTCG TACGATGTAT
CBB23 TCTTTTGTTC TTCAGATAAT AAAATTCAGC CAGCTTTGCT TGCTTCGTCG TACG-TGTAT
Consensus ***** *** ***** * ***** ***** ***** ***** *****

....|....| ....|....| ....|....| ....|....| ....|....| ....|....|
      1025      1035      1045      1055      1065      1075
H120 GCCTCATCAT ATCCTCATCC ATCAGCTGCT CATTAGCTAG CTGGAC-GTG TATATGGTGG
CBB23 GC-TCATCAT ATCCTCATCC ATCAGCTGCT CAT-AGCTAG CTGGGCCGTG T-TATATGTG
Consensus ** ***** ***** ***** ***** ***** ***** * *** *

....|....| ....|....| ....|....| ....|....| ....|....| ....|....|
      1085      1095      1105      1115      1125      1135
H120 TGTTAGTGAA TCAGTCACAT CCATGTAATT CATCCCATGT ATGTTAATTC GTTTTTTCATT
CBB23 TGT-AGTGA- TCAGTCACAT CCATGTATTT CATCCCATGT ATGTTAGTTT GTTTTTTCATT
Consensus *** ***** ***** ***** ** ***** ***** ***** ** *****

....|....| ....|....| ....|....| ....|....| ....|....| ....|....|
      1145      1155      1165      1175      1185      1195
H120 TTTGAAAGAA AACATGCATA TATGTTATGA CTCAAAGTTT TGAGATGAAT TTGATCATCT
CBB23 TTTGAAAGAA AACATGCATA TATGTTATAA CTCAAAGTTT TGAGATGAAT TTGATCATCT
Consensus ***** ***** ***** * ***** ***** ***** *****

....|....| ....|....| ....|....| ....|....| ....|....| ....|....|
      1205      1215      1225      1235      1245      1255
H120 AAGTTGATTG CCATTTGGAA TTATTCTGCT CTGTTGTTGC AACTTTTTTT TTTTTTATGT
CBB23 AATTT-ATTT CCGTTTTGAA TTATTCTGCT CTGTTGTTGC AACTTTTTTT TTT-TATGT
Consensus ** ** *** ** *** *** ***** ***** ** ***** *** *****

....|....| ....|....| ....|....| ....|....| ....|....| ....|....|
      1265      1275      1285      1295      1305      1315
H120 TGGGACACTT TTCCTCCCTC GATTGGATTG GTTATTATTG AAATTTTCGC GATTTCATGCT
CBB23 TGGGACACTT TC---TCCTC GGTTTGATTG -TTAT-ATTG AA--TTCGC GATTCCAGCT
Consensus ***** * ***** * ** ***** ***** ***** ***** *****

```

```

....|....|....|....|....|....|....|....|....|....|
 1325    1335    1345    1355    1365    1375
H120    AATAATAATA TTTGCCTAGG TTCCACTTCA GAAACAATCA TGC-TAATTG CTGATTCAGG
CBB23   AGTA--TATA TTTGCT--AG TTTCACTC-- -AGACAATCA TGCCTATTTG CTGATCAGGA
Consensus * **  *** ***** * ** **** * ***** *** ** *** ***** *

```

```

....|....|....|....|....|....|....|....|....|....|
 1385    1395    1405    1415    1425    1435
H120    ACA-TTGAAA ACAACCATTA CAGAGCCAGA CGAAATTAAT TAATTTACAC TCACCAATTA
CBB23   ACAATTGAAA ACAACCATTA CAGAGCCAGA CGAAATTAAT TAATTTACAC TCACCAATTA
Consensus *** ***** ***** ***** ***** ***** ***** *****

```

```

....|....|....|....|....|....|....|....|....|....|
 1445    1455    1465    1475    1485    1495
H120    TTCATCATCA CATCTCTAAA CACCGAATTC TGGGATTCCA TCGTTCGTCC CCTTCCCGCA
CBB23   TTCATCATCA CATCTCTAAA CATCGAATTC TGGGATTCCA TCGTTCGTCC CCTTCCCGCA
Consensus ***** ***** ** ***** ***** ***** *****

```

```

....|....|....|....|....|....|....|....|....|....|
 1505    1515    1525    1535    1545    1555
H120    GCCGTCCGAT CGCGGATCGA CGGTGGCAGA TCGCTTCGTT GAACGTTTTT GTAATATAACC
CBB23   GCCGTCCGAT CGCGGATCGA CGGTGGCAGA TCGCTTCGTT GAACGTTTTT GTAATATAACC
Consensus ***** ***** ***** ***** ***** *****

```

```

....|....|....|....|....|....|....|....|....|....|
 1565    1575    1585    1595    1605    1615
H120    ATTTCTTGAG GGGGGTTTAT GCAAATATC TCTATCCCTT ACCTCCTCCT ACCTCGCCGG
CBB23   ATTTCTTGAG GGGGGTTTAT GCAAATATC TCTATCCCTT ACCTCCTCCT ACCTCGCCGG
Consensus ***** ***** ***** ***** ***** *****

```

```

....|....|....|....|....|....|....|....|....|....|
 1625    1635    1645    1655    1665    1675
H120    CGTGACGCTC TCCTCCCTCA CTCCCATCCG CCGCCGGCGA GGCCCTCTTC GCCGCCGTGT
CBB23   CGTGACGCTC TCCTCCCTCA CTCCCATCCG CCGCCGGCGA GGCCCTCTTC GCCGCCGTGT
Consensus ***** ***** ***** ***** ***** *****

```

```

....|....|....|....|....|....|....|....|....|....|
 1685    1695    1705    1715    1725    1735
H120    CCTCCTCGTC GTCGCTGTAT GGGGCGAG-- -----
CBB23   CCTCCTCGTC GTCGCTGTAT GGGGCGAGGC CGCGGCCCGC GAGGGGCTCG GTGGCGGCCG
Consensus ***** ***** *****

```

```

....|....|
 1745

```

H120           -----  
CBB23       GGGGGATGG  
Consensus

Supplementary Fig.1 Sequence comparison of *Xa23* alleles between H120 and CBB230

Supplementary Table 1 Protein products of candidate genes.

| Genes No.      | Protein products                                                                                        |
|----------------|---------------------------------------------------------------------------------------------------------|
| Loc_Os11g37530 | Oryza sativa Japonica Group (Japanese rice) hypothetical protein                                        |
| Loc_Os11g37540 | Oryza sativa Japonica Group (Japanese rice) Serine/threonine-protein kinase Doa, putative, expressed    |
| Loc_Os11g37550 | Oryza sativa Japonica Group (Japanese rice) Calmodulin-2/3/5, putative                                  |
| Loc_Os11g37560 | Oryza sativa Japonica Group (Japanese rice) expressed protein                                           |
| Loc_Os11g37570 | Oryza sativa Japonica Group (Japanese rice) hypothetical protein                                        |
| Loc_Os11g37580 | Oryza sativa Japonica Group (Japanese rice) hypothetical protein                                        |
| Loc_Os11g37590 | Oryza sativa Japonica Group (Japanese rice) transposon protein, putative, CACTA, En/Spm sub-class       |
| Loc_Os11g37600 | Oryza sativa Japonica Group (Japanese rice) transposon protein, putative, CACTA, En/Spm sub-class       |
| Loc_Os11g37610 | Oryza sativa Japonica Group (Japanese rice) hypothetical protein                                        |
| Loc_Os11g37620 | Oryza sativa Japonica Group (Japanese rice) hypothetical protein                                        |
| Loc_Os11g37630 | Oryza sativa Japonica Group (Japanese rice) hypothetical protein                                        |
| Loc_Os11g37640 | Oryza sativa Japonica Group (Japanese rice) ADP-ribosylation factor-like protein 5, putative, expressed |

Supplementary Table 2 The sequencing data quality evaluation

| Sample name | Raw reads | Clean reads | clean bases | Error rate(%) | Q20(%) | Q30(%) | GC content(%) |
|-------------|-----------|-------------|-------------|---------------|--------|--------|---------------|
| H120_0      | 65823390  | 64916394    | 9.74G       | 0.03          | 97.53  | 93.37  | 57.82         |
| H120_6      | 54913954  | 54047284    | 8.11G       | 0.03          | 97.53  | 93.38  | 56.51         |
| H120_12     | 55992908  | 55235918    | 8.29G       | 0.03          | 97.52  | 93.35  | 55.42         |
| H120_24     | 63701086  | 62621496    | 9.39G       | 0.03          | 97.38  | 93.04  | 57.26         |
| H120_48     | 58803452  | 57851162    | 8.68G       | 0.03          | 97.56  | 93.42  | 57.15         |
| H120_72     | 61770804  | 60697432    | 9.1G        | 0.03          | 97.54  | 93.35  | 56.8          |
| H120_96     | 43437362  | 42672430    | 6.4G        | 0.03          | 97.73  | 93.8   | 56.77         |



Supplementary Table 3 The comparison of RNA-seq reads of H120 and reference genomes of Nipponbare

| Sample name      | H120_0            | H120_6            | H120_12           | H120_24           | H120_48           | H120_72           | H120_96           |
|------------------|-------------------|-------------------|-------------------|-------------------|-------------------|-------------------|-------------------|
| Total reads      | 64916394          | 54047284          | 55235918          | 62621496          | 57851162          | 60697432          | 42672430          |
| Total mapped     | 61776944 (95.16%) | 50938218 (94.25%) | 51868621 (93.9%)  | 59543333 (95.08%) | 54996190 (95.06%) | 58456988 (96.31%) | 40590901 (95.12%) |
| Multiple mapped  | 1346915 (2.07%)   | 1084535 (2.01%)   | 1198941 (2.17%)   | 1333339 (2.13%)   | 1245205 (2.15%)   | 1337837 (2.2%)    | 1034384 (2.42%)   |
| Uniquely mapped  | 60430029 (93.09%) | 49853683 (92.24%) | 50669680 (91.73%) | 58209994 (92.96%) | 53750985 (92.91%) | 57119151 (94.1%)  | 39556517 (92.7%)  |
| Read-1           | 30286633 (46.65%) | 24962858 (46.19%) | 25384863 (45.96%) | 29231634 (46.68%) | 26936259 (46.56%) | 28611201 (47.14%) | 19777340 (46.35%) |
| Read-2           | 30143396 (46.43%) | 24890825 (46.05%) | 25284817 (45.78%) | 28978360 (46.28%) | 26814726 (46.35%) | 28507950 (46.97%) | 19779177 (46.35%) |
| Reads map to '+' | 30171257 (46.48%) | 24881181 (46.04%) | 25263980 (45.74%) | 29077562 (46.43%) | 26836652 (46.39%) | 28543849 (47.03%) | 19763331 (46.31%) |
| Reads map to '-' | 30258772 (46.61%) | 24972502 (46.2%)  | 25405700 (45.99%) | 29132432 (46.52%) | 26914333 (46.52%) | 28575302 (47.08%) | 19793186 (46.38%) |

Supplementary Table 4 The number of genes at different expression levels

| FPKM Interval | H120_0        | H120_6        | H120_12       | H120_24       | H120_48       | H120_72       | H120_96       |
|---------------|---------------|---------------|---------------|---------------|---------------|---------------|---------------|
| 0~1           | 40817(71.39%) | 38438(67.23%) | 37685(65.91%) | 41229(72.11%) | 40575(70.96%) | 39862(69.72%) | 39770(69.55%) |
| 1~3           | 4369(7.64%)   | 3731(6.53%)   | 3567(6.24%)   | 4110(7.19%)   | 4038(7.06%)   | 3988(6.97%)   | 3781(6.61%)   |
| 3~15          | 7558(13.22%)  | 8240(14.41%)  | 8326(14.56%)  | 7263(12.70%)  | 7698(13.46%)  | 7926(13.86%)  | 7731(13.52%)  |
| 15~60         | 3266(5.71%)   | 5118(8.95%)   | 5699(9.97%)   | 3257(5.70%)   | 3531(6.18%)   | 3957(6.92%)   | 4406(7.71%)   |
| >60           | 1168(2.04%)   | 1651(2.89%)   | 1901(3.32%)   | 1319(2.31%)   | 1336(2.34%)   | 1445(2.53%)   | 1490(2.61%)   |

Supplementary Table 5 Primer sequence of polymorphic microsatellite (SSR) markers used in the study.

| Marker name | Forward (5' - 3')          | Reverse (5' - 3')          | PCR <sup>a</sup> | Gel <sup>b</sup> | Products size (bp) | Marker Position |
|-------------|----------------------------|----------------------------|------------------|------------------|--------------------|-----------------|
| RM26777     | AACCTAGGAGCGTTTGTAGATGTGC  | GATGCGTTACATCTGGCACTGG     | A                | I                | 159                | 17924318        |
| RM26801     | GCCTTCATCCGTAAATCCATAAGC   | GAGTACCACATGGCATTATGAGAGC  | A                | I                | 166                | 18578807        |
| RM457       | GCACAAGTTGATACTCTCCTCTGACG | CCACCATTATCTGCTCCATCACC    | A                | I                | 111                | 19531155        |
| RM26834     | ACGAGTGTATATGGGAACAACC     | GCAATCTAGGAGCGTTTATAGG     | B                | I                | 260                | 19266758        |
| RM26988     | TCTATTTCTGTCCCTCCTCTTTGG   | AGGCCCGACACATAAACAATAGG    | A                | I                | 152                | 22336291        |
| RM206       | ATCGATCCGTATGGGTTCTAGC     | GTCCATGTAGCCAATCTTATGTGG   | B                | II               | 477                | 22480814        |
| RM26820     | AACAGATGCACGTCTACACTTTCC   | GTGGACTGGAGCTGTGCTAGG      | B                | I                | 279                | 18981546        |
| RM26965     | TAAGATGCTAGACCCATCCATGTCCG | GACGGAGGGAGTAGCTAGGTAGAGC  | B                | I                | 231                | 21960409        |
| RM26977     | GAGCCTCCGCTGAGTCTTCG       | CGCCTCCTTCTCCTCTCATCC      | B                | I                | 213                | 22134904        |
| RM26979     | ACAACCTCCTCTCTGTTTCACTACCC | CTGCTCTTTGTGCGCTTTATCC     | A                | I                | 145                | 22150068        |
| RM26981     | GTCCATGGCTTGGATTTATGAAGG   | CATAGAAACAGCTCCATCGTTTGC   | B                | I                | 367                | 22156064        |
| RM26982     | ACCAACCCGACTAAAGATCTCG     | TTGGAGGATGAAGTTGCAAACC     | B                | I                | 258                | 22188811        |
| RM26984     | ATTCCCACCACAACCAAGATGC     | CATGAGGAAGAAGCAGCACAAGC    | B                | I                | 258                | 22221407        |
| RM26985     | CACAAGACAACCTTCAATGG       | GGCTTAGGAGCGTTTATAGG       | A                | I                | 183                | 22233214        |
| RM26999     | CGGCTTCGGCTTCTTCTTCC       | GACACTCCCGTTTGTATAACTGTTGC | A                | I                | 173                | 22640888        |

<sup>a</sup>A: After preheating 4 min at 94°C, 35 PCR cycles (30 sec at 94°C, 45 sec at 55°C, 1 min at 72°C), followed by 5 min at 72°C. B: After preheating 4 min at 94°C, 35 PCR cycles (30 sec at 94°C, 45 sec at 60°C, 1 min at 72°C), followed by 7 min at 72°C.

<sup>b</sup>I = 8% acrylamide, II = 1.2% agarose gel.

Supplementary Table 6 Primers used for amplification and sequencing in this research

| Primer name | Primer sequence (5'-3') | Description              |
|-------------|-------------------------|--------------------------|
| A23-F1      | TAGCTGCCACGTCAGCTAGG    | amplification/sequencing |
| A23-F2      | GCACAATGTCAGCGCCAGTC    | amplification/sequencing |
| A23-F3      | AAGTCCCTTCCGCGTCACTA    | amplification/sequencing |
| A23-F4      | TCAAGGAGCTGCAAGCACTTCC  | amplification/sequencing |
| A23-R1      | CTCGCCCCATACAGCGACGA    | amplification/sequencing |
| A23-R2      | GCATACACGTACGACGAAGCAA  | amplification/sequencing |
| A23-R3      | GGCCCAGCTAGCTATGAGCA    | amplification/sequencing |
